# Supplementary material
Source: Springer Nature journal article supplement (https://www.springermedizin.de/resource/supplementary/12998_2011_30_MOESM2_ESM.pdf/9680048)

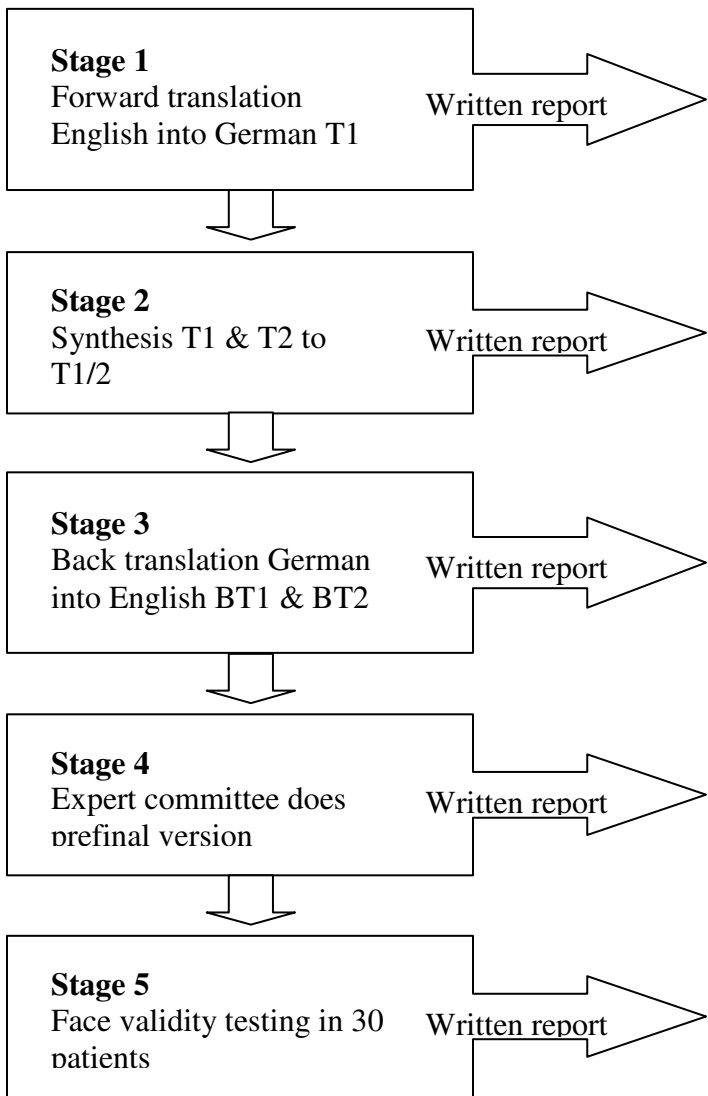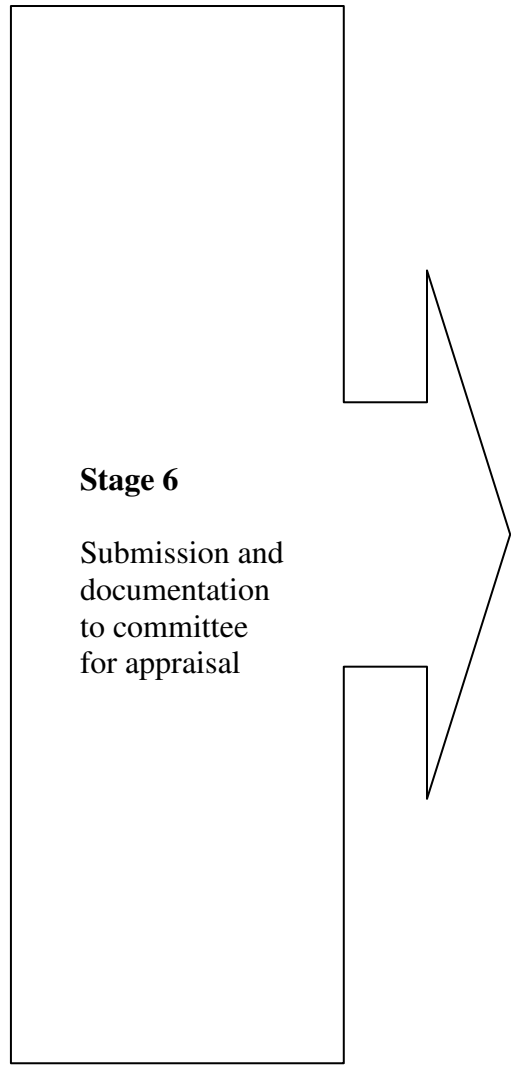

Supplement: MOESM2 [file 9680048]
